# Supplementary material for: Manipulating the surface composition of Pt–Ru bimetallic nanoparticles to control the methanol oxidation reaction pathway
Source: Royal Society of Chemistry journal article supplement (doi:10.1039/c9cc09423g), 2020-01-01
Supplement: c9cc09423g1.pdf [file c9cc09423g1.pdf]

# Manipulating the Surface Composition of Pt-Ru Bimetallic Nanoparticles to Control the Methanol Oxidation Reaction Pathway

Qingmei Wang<sup>1</sup>, Siguo Chen<sup>1\*</sup>, Jian Jiang<sup>2</sup>, Jinxuan Liu<sup>2</sup>, Jianghai Deng<sup>1</sup>, Xinyu Ping<sup>1</sup>, Zidong Wei<sup>1\*</sup>

<sup>1</sup>The State Key Laboratory of Power Transmission Equipment & System Security and New Technology, Chongqing Key Laboratory of Chemical Process for Clean Energy and Resource Utilization, School of Chemistry and Chemical Engineering, Chongqing University, Chongqing 400044, China. <sup>2</sup>The State Key Laboratory of Fine Chemical Industry, Dalian University of Technology, Dalian, China.

Corresponding Author: [\\*csg810519@126.com](mailto:*csg810519@126.com); [\\*zdwei@cqu.edu.cn](mailto:*zdwei@cqu.edu.cn)

## Experiment Section

### Chemicals and materials

Commercial Pt/C catalyst (JM, 20 wt% Pt). Antimony trichloride (RuCl<sub>3</sub>, 99%), 4-(2-ethylamino) benzene-1,2-diol (C<sub>8</sub>H<sub>11</sub>O<sub>2</sub>N, 90%, purchased from adamas-beta). Tetraethyl orthosilicate (Si(OC<sub>2</sub>H<sub>5</sub>)<sub>4</sub>, 98%), Tris (hydroxymethyl) aminomethane (C<sub>4</sub>H<sub>11</sub>NO<sub>3</sub>, 99.5%), Nafion (5% in a mixture of lower aliphatic alcohols and water). High-pure Milli-Q H<sub>2</sub>O (18.2MΩ, TOC<2ppb) was used to make all the solutions.

### Synthesis of series Pt<sub>1</sub>Ru<sub>x</sub>/C@NC samples

The Pt<sub>1</sub>Ru<sub>x</sub>/C@NC catalysts was prepared according to our previous reported method with some modification. In a typical synthesis, 100 mg commercial Pt/C powder (JM, 20 wt. % Pt) was dispersed in 20 mL ethanol solution, the solution was then stirred ultrasonically at room temperature for 30min to achieve homogeneous dispersion, the 20 mL deionized water was added to 20ml ethanol solution. The mixture solution was also stirred ultrasonically at room temperature for 30min, and then adding 40 mg dopamine (PDA) which dissolved in 10 mL Tris-HCl (50 mM, pH≈8.5)

solution. The mixture was stirred for 16 h at room temperature. The obtained nanocomposite (Pt/C-PDA) was gathered by centrifugation and washing with deionized water and then dried at 80°C for 8 h. The obtained Pt/C-PDA was stirred with RuCl<sub>3</sub> solutions in deionized water to form Pt/C-PDA-Ru<sup>3+</sup> suspension. After 12 h stirring, adding 2 mL TEOS and 2 mL HCl (PH=3) solution to the pre-prepared Pt/C-PDA-Ru<sup>3+</sup> suspension and the admixture was mixed at room temperature for 30min to receive a uniform mixture. The uniform mixture was moved to glass petri dishes and allowed to slowly evaporate in open circumstances until the composite films (Pt/C-PDA-Ru<sup>3+</sup>-SiO<sub>2</sub>) formed. For pyrolysis of the Pt/C-PDA-Ru<sup>3+</sup>-SiO<sub>2</sub>, the solid films were heated at a rate of 10°C/min to 700°C and maintained for 4 h under flowing 8%H<sub>2</sub>/92%Ar to obtain the PtRu-SiO<sub>2</sub> alloy series composites. After slowly cooling the sample to room temperature, the PtRu-SiO<sub>2</sub> alloy composites were etched by 0.3M HF to removal the surface silica shells. The resulting products were washed with anhydrous alcohol and deionized water and finally dried under vacuum at 60 °C for 24 h. The final catalyst of Pt<sub>1</sub>Ru<sub>0.5</sub>/C@NC, Pt<sub>1</sub>Ru<sub>1</sub>/C@NC and Pt<sub>1</sub>Ru<sub>2</sub>/C@NC catalysts were prepared by adding the 20ul, 40ul, and 80ul 0.26g<sub>Ru</sub>/ml RuCl<sub>3</sub> solutions, respectively.

### **Characterization**

Physical Characterization X-ray diffraction (XRD) patterns were recorded on a XRD6000 using Cu K $\alpha$  radiation ( $\lambda=1.5418 \text{ \AA}$ ) at a step rate of 2°/s. Low-resolution transmission electron microscopy (TEM) was carried out on a FEI Tecnai G220S-TWIN instrument operating at 120 kV. High-resolution transmission electron microscopy (HRTEM), Atomically resolved Aberration-corrected high-angle annular dark-field scanning TEM (ACHAADF-STEM) in combination with energy-dispersive X-ray spectroscopy (EDX) were carried out on the Aberration-Corrected TEM FEI Titan 80-300 instrument operating at accelerating voltage of 80-300 kV (Spherical Aberration:  $\leq 2\mu\text{m}$ , Adjustable; TEM Information limit:  $\leq 0.08\text{nm}$ ; STEM Resolution:  $\leq 0.136\text{nm}$ ; EELS Energy Resolution:  $\leq 0.7\text{eV}$ ). XPS was acquired using a Kratos XSAM800 spectrometer equipped with monochromatic Al X-ray source (Al KR, 1.4866 keV), the vacuum in the analysis chamber was maintained at  $10^{-7}$  Pa, and the binding energy was calibrated by using 284.6 eV as the C 1s peak energy. The concentration of Pt and Ru in the as-prepared catalysts was determined by the inductively coupled plasma mass spectrometry (Thermo Fisher Scientific, iCAP6300 ICP-MS)

### **Electrochemical measurements**

All electrochemical experiments were performed on the electrochemical workstation of Autolab PGSTAT302N at room temperature ( $25\pm 1^\circ\text{C}$ ), using a three electrodes electrochemical setup with a rotating disk electrode (RDE) system in a standard three-electrode cell. The cell associated of a glassy carbon working electrode (GC electrode, 5mm in diameter, PINE: AFE3T050GC), an Ag/AgCl (3M KCl) reference electrode and a graphite rod counter electrode. All potentials in this work were given relative to the reversible hydrogen electrode (RHE). Specifically, the potential measured with a Ag/AgCl electrode can be related by  $E(\text{RHE}) = E(\text{Ag/AgCl}) + 0.267 \text{ V}$ . The working electrodes were prepared by applying catalyst ink onto GC disk electrodes. In brief, the 2mg electrocatalyst was dispersed in ethanol and ultrasonicated for 30 min to form a uniform catalyst ink. A total of 10 $\mu\text{L}$  of well-dispersed catalyst ink was applied onto a pre-polished GC disk. After drying at room temperature, a drop of 0.01 wt% Nafion solution was applied onto the surface of the catalyst layer to form a thin protective film. The prepared electrodes were dried at room temperature before electrochemical tests. Before electrochemical measurements, all the electrodes were pretreated by cyclic voltammetry (CV) at potential between 0.05 V to 0.9 V at a sweep rate of 50 mV/s for 30 cycles to remove any surface contamination in 0.1M HClO<sub>4</sub>. The methanol oxidation reaction (MOR) was conducted by CV at 0-1.2V for 20 cycles in N<sub>2</sub>-saturated 0.1 M HClO<sub>4</sub> solution containing 0.5M CH<sub>3</sub>OH. The CO stripping were conducted in N<sub>2</sub>-saturated 0.1 M HClO<sub>4</sub> solution which was purged with CO before the measurement at 10 mV/s. Chronoamperometry was carried out at the constant potential of 0.7 V in 0.1M HClO<sub>4</sub> + 0.5 M CH<sub>3</sub>OH. The electrochemical surface area (ECSA) of Pt in the catalysts using the following equation (E1):

$$ECSA = Q_{co} / 0.42 [Pt] \quad (\text{E1})$$

where  $Q_{co}$  is the charge due to the integrated area of the CO dissolved peak, 0.42 mC/cm is the electrical charge associated with monolayer adsorption of hydrogen on Pt, and [Pt] is the loading of Pt on the working electrode.

Here we choose (111) crystal plane as the computational crystal plane.  $L$  is the lattice parameter and  $d$  represent the interplanar spacing of the selected crystal faces. The induced strain variation was approximately calculated by the Debye-Scherrer equation and Bragg's law, details calculated by the following equations (E2-E3):

$$L = 1/2d \quad (\text{E2})$$

$$L_2 \text{Strain}\% = (L_2 - L_1 / L_1)\% \quad (\text{E3})$$

Among which,  $L_2$  strain% is the percentage change of the lattice parameter of the studied catalyst (PtRu/C@NC) when compared to standard sample 1 (Pt/C),  $L_1$  represents the lattice parameter of the Pt/C, and  $L_2$  is the lattice parameter of the researched PtRu/C@NC sample.

$$C(\text{nm}) = \frac{0.9\delta}{B(2\theta) \cdot \cos(\theta)} \quad (\text{E4})$$

C is the interplanar spacing of the selected crystal plane, B is the half width of the selected crystal plane,  $2\theta$  is the angle corresponding to the selected crystal plane, and  $\delta$  is the wavelength of the Cu target, which is generally 1.5456 nm.

### ***In situ* Fourier transform infrared-diffuse reflection spectrum (FTIRs)**

The external potential in the experiment was realized by potentiostat. The instrument of React IR TM 15 the detection frequency was 1Hz with the indexing value of  $4\text{cm}^{-1}$  was used to acquisition reaction signal. The mass spectrometry signal was 20 points per second. All the spectra are presented in the form of absorption spectra. The electrochemical properties and electrocatalytic behavior of the catalysts in a simple three-electrode system (see Chapter 1.4 for details). The *in-situ* FTIRs recorded simultaneously with the chronoamperometric (CA) test in the 0.1M  $\text{HClO}_4$ +0.5M  $\text{CH}_3\text{OH}$  solution. Before *In situ* FTIR measurement, the catalyst was activated in  $\text{N}_2$  saturated 0.1M  $\text{HClO}_4$  solutions for 30 cycles (to ensure steady-state reactivity). The infrared background spectra are collected at the same time. After that, the electrolyte 0.1M  $\text{HClO}_4$  solution switched to  $\text{N}_2$  saturated 0.1M  $\text{HClO}_4$ +0.5M  $\text{CH}_3\text{OH}$  solution. Chronoamperometric at constant potential of 0.05V, 0.1V, 0.3V, 0.5V, 0.7V, 0.85V were conducted, simultaneous recording the *in-situ* FTIR spectrum under chronoamperometric on a constant potential of the homemade PtRu catalyst after 10s, 50s, 100s, 200s, 300s.

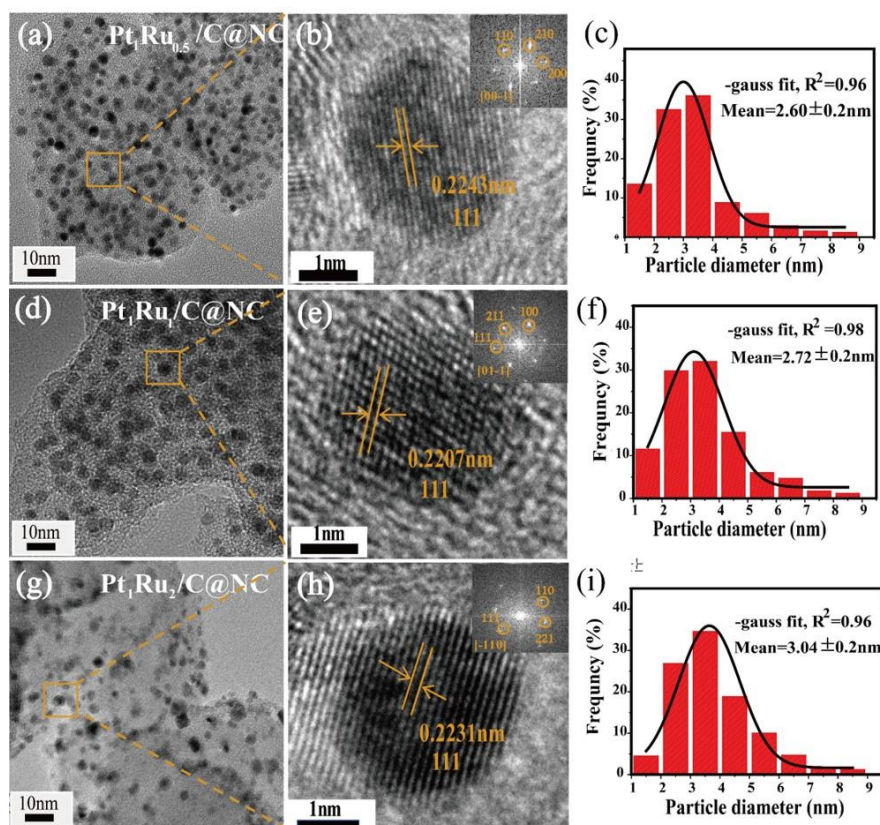

**Figure S1.** The HRTEM images and its corresponding FFT images as well as the corresponding statistical particle size of Pt<sub>1</sub>Ru<sub>0.5</sub>@NC/C (a-c), Pt<sub>1</sub>Ru<sub>1</sub>@NC/C (d-f) and Pt<sub>1</sub>Ru<sub>2</sub>@NC/C (g-i) catalysts, respectively.

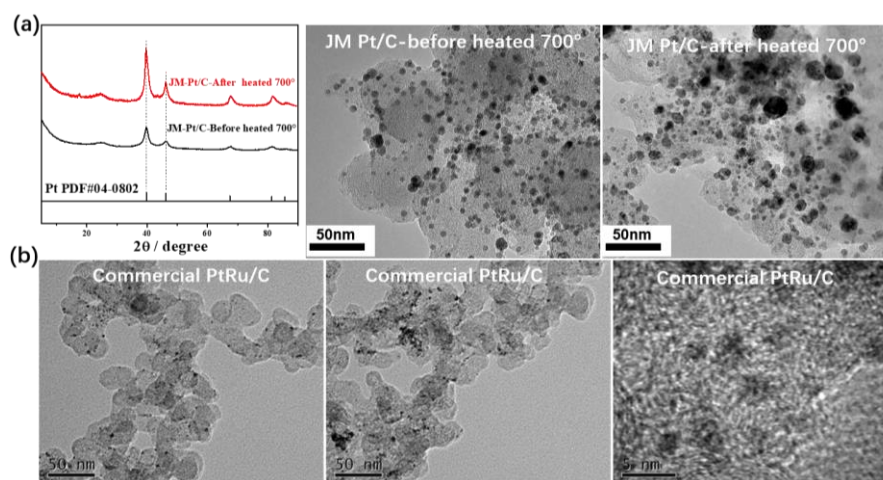

**Figure S2.** (a) The XRD and corresponding TEM curves of commercial Pt/C catalysts before and after high temperature annealing. (b) The TEM and HRTEM images of commercial PtRu/C catalysts.

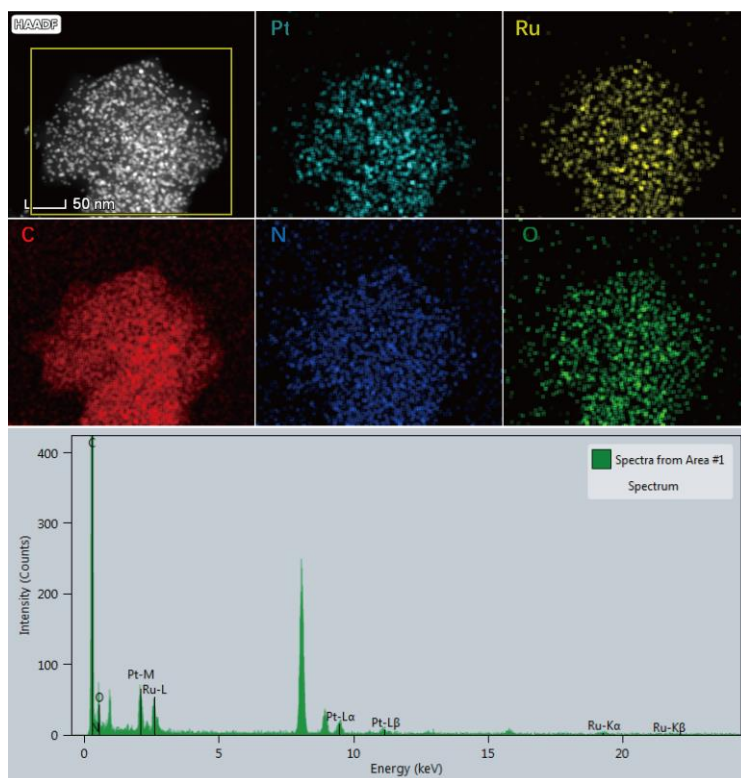

**Figure S3.** HAADF-TEM image and the corresponding elemental mapping as well as the EDX profile of the Pt<sub>1</sub>Ru<sub>1</sub>@NC/C catalysts.

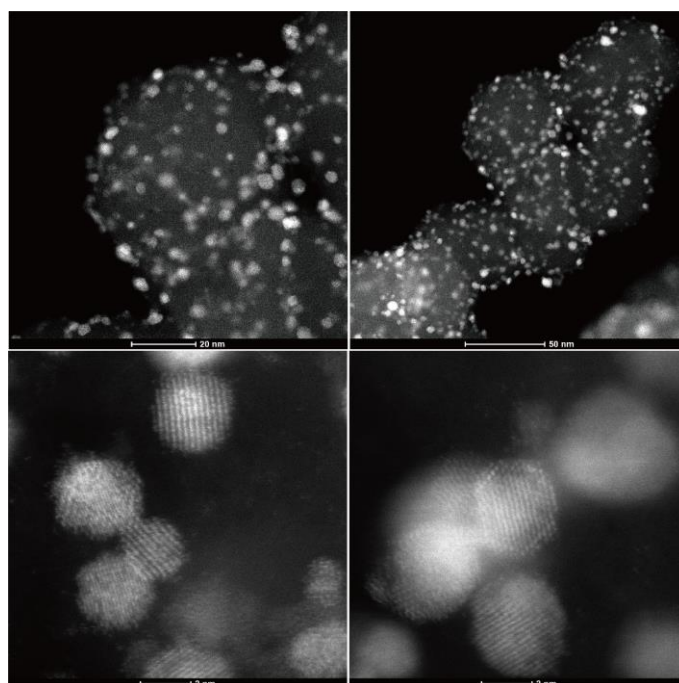

**Figure S4.** More detailed aberration-corrected HAADF-STEM images of Pt<sub>1</sub>Ru<sub>1</sub>@NC/C catalysts

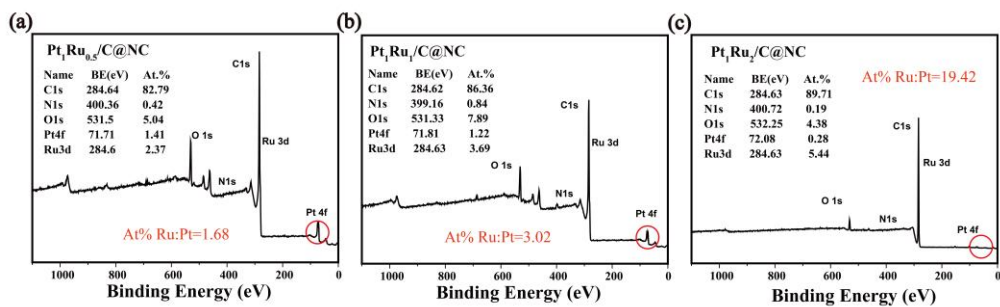

**Figure S5.** The elemental compositions of Pt<sub>1</sub>Ru<sub>0.5</sub>@NC/C (a), Pt<sub>1</sub>Ru<sub>1</sub>@NC/C (b) and Pt<sub>1</sub>Ru<sub>2</sub>@NC/C (c) catalysts performed in XPS.

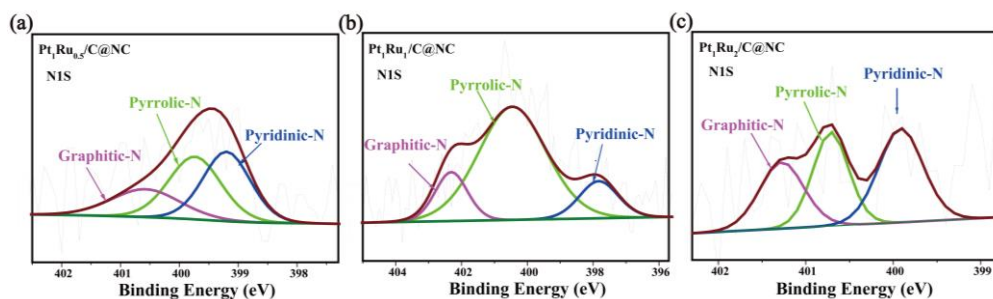

**Figure S6.** The N 1s of Pt<sub>1</sub>Ru<sub>0.5</sub>@NC/C (a), Pt<sub>1</sub>Ru<sub>1</sub>@NC/C (b) and Pt<sub>1</sub>Ru<sub>2</sub>@NC/C (c) catalysts.

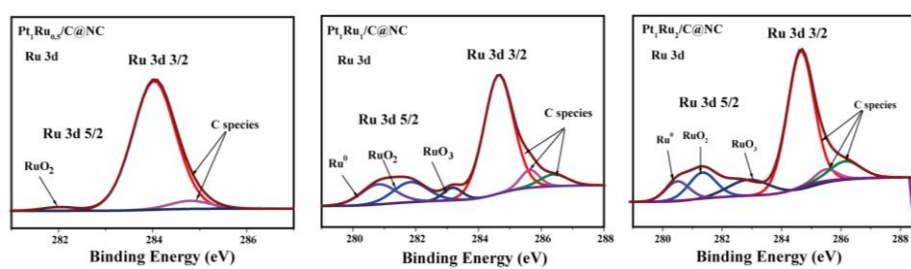

**Figure S7.** The Ru 3d of Pt<sub>1</sub>Ru<sub>0.5</sub>@NC/C, Pt<sub>1</sub>Ru<sub>1</sub>@NC/C and Pt<sub>1</sub>Ru<sub>2</sub>@NC/C catalysts.

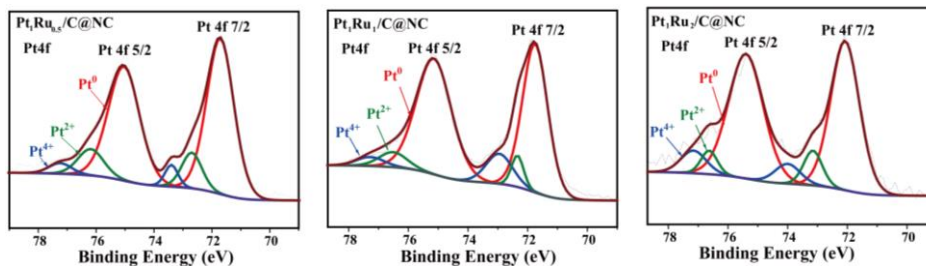

**Figure S8.** The Pt 4f of  $\text{Pt}_1\text{Ru}_{0.5}@NC/C$ ,  $\text{Pt}_1\text{Ru}_1@NC/C$  and  $\text{Pt}_1\text{Ru}_2@NC/C$  catalysts.

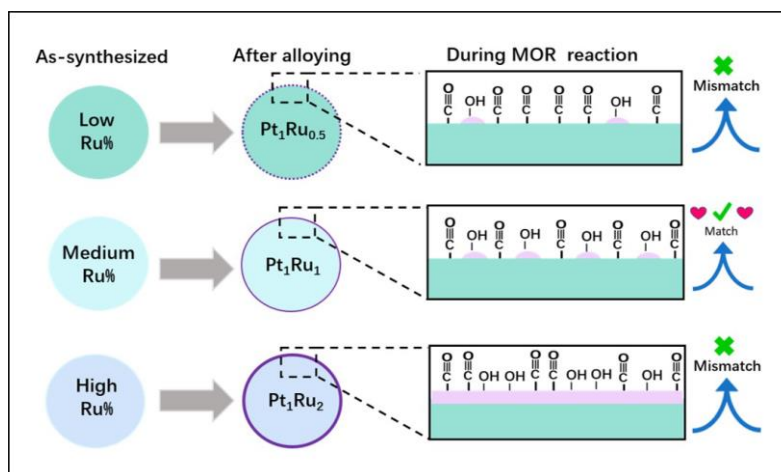

**Scheme S1.** Schematic illustration of surface evolution and bimetallic synergy in PtRu alloy nanoparticles with different Ru percentage content. Low Ru% represent the low molar feeding of  $\text{Ru}^{3+}$  to Pt ( $\text{Pt}_1\text{Ru}_{0.5}@NC/C$ ), medium Ru% means the catalyst of  $\text{Pt}_1\text{Ru}_1@NC/C$ , High Ru% represent the of  $\text{Pt}_1\text{Ru}_2@NC/C$  catalyst. Pt is shown in blue; Ru and  $\text{RuO}_x$  are depicted in purple.

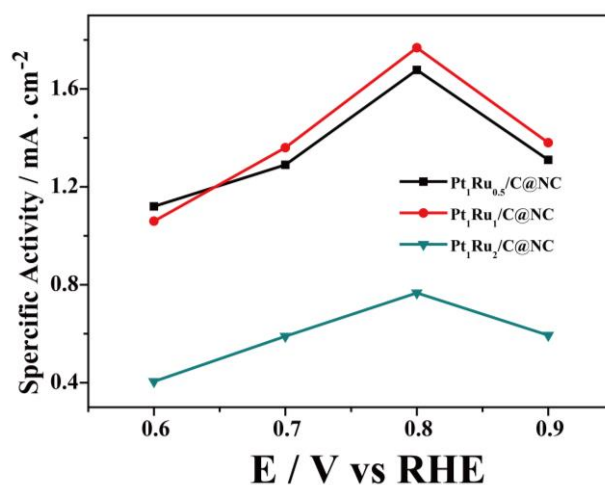

**Figure S9.** The relationship between specific activity normalized to Pt surface area with the MOR electrocatalytic activity of the  $\text{Pt}_1\text{Ru}_{0.5}@NC/C$ ,  $\text{Pt}_1\text{Ru}_1@NC/C$  and  $\text{Pt}_1\text{Ru}_2@NC/C$  catalysts.



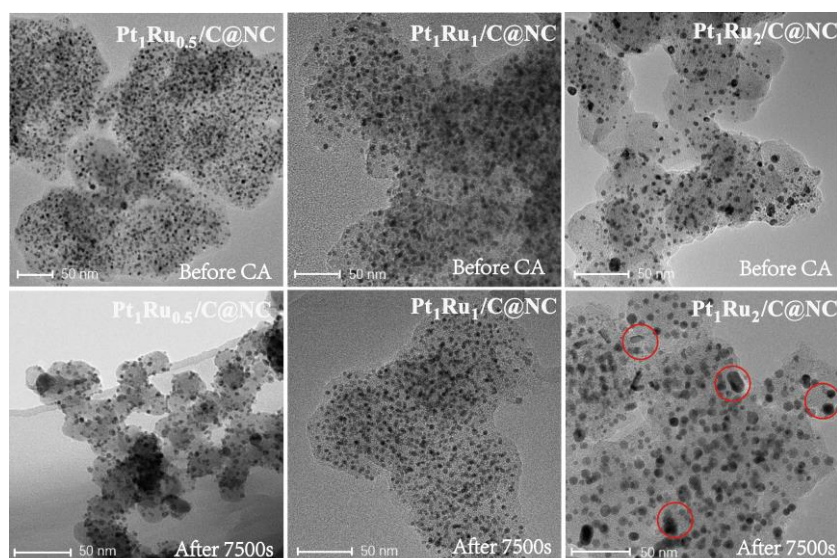

**Figure S10.** The TEM images of  $\text{Pt}_1\text{Ru}_{0.5}\text{@NC/C}$ ,  $\text{Pt}_1\text{Ru}_1\text{@NC/C}$  and  $\text{Pt}_1\text{Ru}_2\text{@NC/C}$  catalysts before and after the CA test.

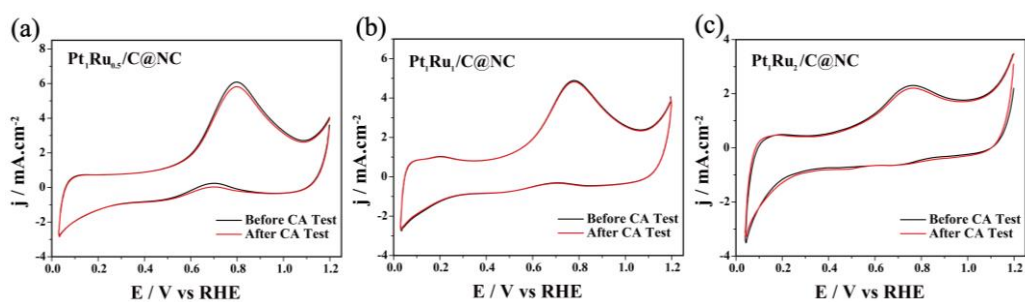

**Figure S11.** CV curves of  $\text{Pt}_1\text{Ru}_{0.5}\text{@NC/C}$  (a),  $\text{Pt}_1\text{Ru}_1\text{@NC/C}$  (b) and  $\text{Pt}_1\text{Ru}_2\text{@NC/C}$  (c) performed in 0.1 M  $\text{HClO}_4$  + 0.5 M  $\text{CH}_3\text{OH}$  solution before and after the CA test.

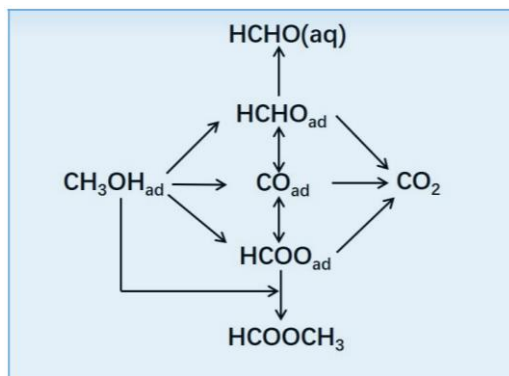

**Scheme S2.** A simplified scheme for the complete electrooxidation of  $\text{CH}_3\text{OH}$  to  $\text{CO}_2$  on Pt in acidic solutions.

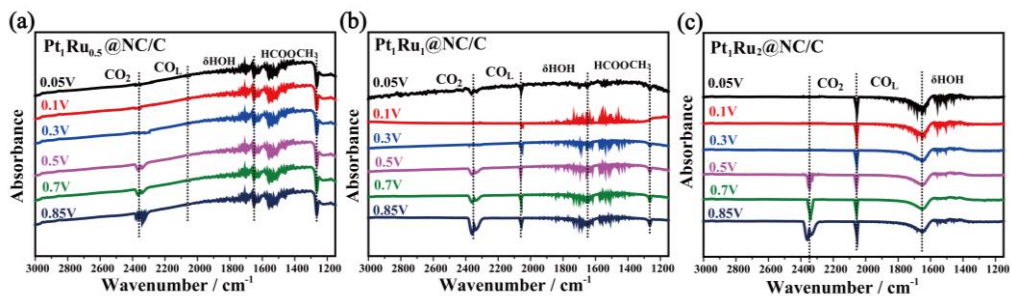

**Figure S12.** *In situ* FTIR spectra for methanol oxidation in 0.1 M HClO<sub>4</sub> + CH<sub>3</sub>OH solution after 10s on Pt<sub>1</sub>Ru<sub>0.5</sub>@NC/C (a), Pt<sub>1</sub>Ru<sub>1</sub>@NC/C (c) and Pt<sub>1</sub>Ru<sub>2</sub>@NC/C.

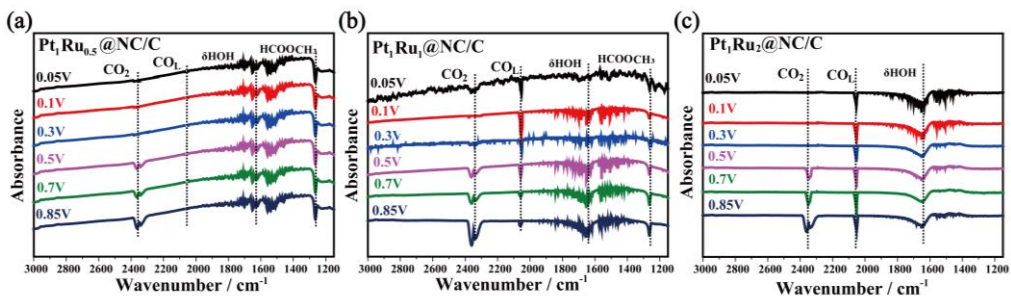

**Figure S13.** *In situ* FTIR spectra for methanol oxidation in 0.1 M HClO<sub>4</sub> + CH<sub>3</sub>OH solution after 50s on Pt<sub>1</sub>Ru<sub>0.5</sub>@NC/C (a), Pt<sub>1</sub>Ru<sub>1</sub>@NC/C (c) and Pt<sub>1</sub>Ru<sub>2</sub>@NC/C.

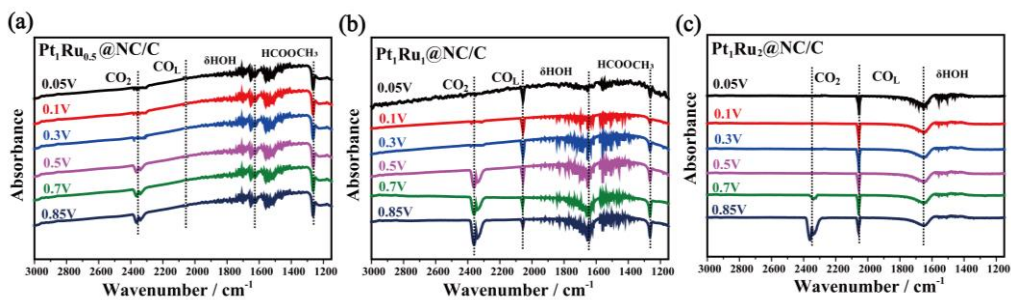

**Figure S14.** *In situ* FTIR spectra for methanol oxidation in 0.1 M HClO<sub>4</sub> + CH<sub>3</sub>OH solution after 200s on Pt<sub>1</sub>Ru<sub>0.5</sub>@NC/C (a), Pt<sub>1</sub>Ru<sub>1</sub>@NC/C (c) and Pt<sub>1</sub>Ru<sub>2</sub>@NC/C.

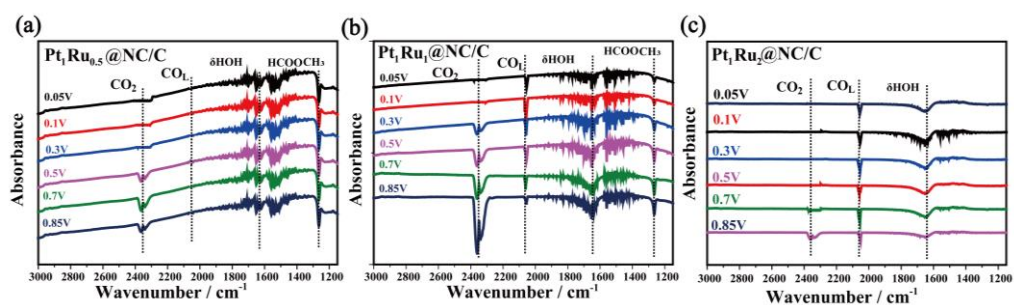

**Figure S15.** *In situ* FTIR spectra for methanol oxidation in 0.1 M HClO<sub>4</sub> + CH<sub>3</sub>OH solution after 300s on Pt<sub>1</sub>Ru<sub>0.5</sub>@NC/C (a), Pt<sub>1</sub>Ru<sub>1</sub>@NC/C (c) and Pt<sub>1</sub>Ru<sub>2</sub>@NC/C.

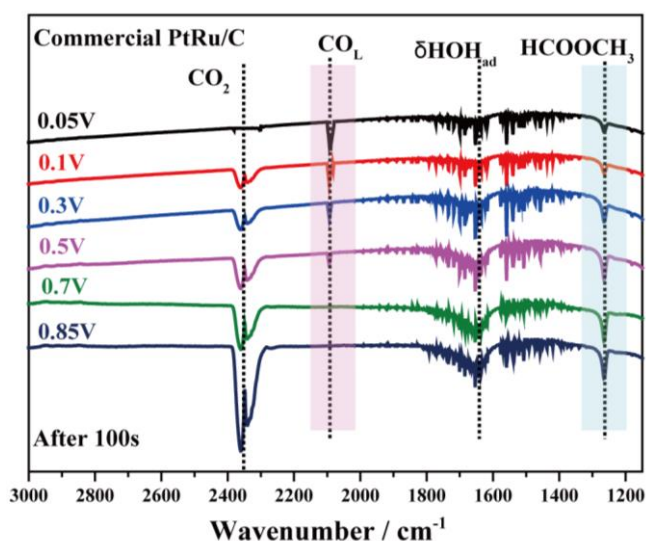

**Figure S16.** The In-situ FTIR spectra for methanol oxidation in 0.1 M HClO<sub>4</sub> + CH<sub>3</sub>OH solution after 100s on commercial PtRu/C catalyst.

| Catalysts                               | ICP (Before Stability test) |                     | ICP (After Stability test) |                     |
|-----------------------------------------|-----------------------------|---------------------|----------------------------|---------------------|
|                                         | Loading by weight%          |                     | Loading by weight%         |                     |
|                                         | Pt loading<br>(wt%)         | Ru loading<br>(wt%) | Pt loading<br>(wt%)        | Ru loading<br>(wt%) |
| Pt <sub>1</sub> Ru <sub>0.5</sub> /C@NC | 7.3                         | 0.8                 | 7.1                        | 0.7                 |
| Pt <sub>1</sub> Ru <sub>1</sub> /C@NC   | 6.3                         | 2.1                 | 6.2                        | 2.0                 |
| Pt <sub>1</sub> Ru <sub>2</sub> /C@NC   | 4.6                         | 3.9                 | 4.3                        | 3.7                 |

**Table S1.** The elemental loadings of Pt<sub>1</sub>Ru<sub>0.5</sub>/C@NC, Pt<sub>1</sub>Ru<sub>1</sub>/C@NC and Pt<sub>1</sub>Ru<sub>2</sub>/C@NC catalysts by using ICP.

| Catalysts                               | 2 $\theta$ /degree | Lattice         | Strain | Particle size | Particle size |
|-----------------------------------------|--------------------|-----------------|--------|---------------|---------------|
|                                         | (111)              | parameter (1/Å) | (%)    | From XRD (nm) | From TEM (nm) |
| JM-Pt/C                                 | 39.763             | 0.2208          | ---    | 2.88          | 3.15          |
| Pt <sub>1</sub> Ru <sub>0.5</sub> /C@NC | 40.390             | 0.2241          | 1.49   | 2.27          | 2.60          |
| Pt <sub>1</sub> Ru <sub>1</sub> /C@NC   | 40.465             | 0.2249          | 1.66   | 2.48          | 2.72          |
| Pt <sub>1</sub> Ru <sub>2</sub> /C@NC   | 40.314             | 0.2233          | 1.13   | 2.96          | 3.04          |

**Table S2.** The detailed lattice parameter and induced strain variation as well as the NP sizes of Pt<sub>1</sub>Ru<sub>0.5</sub>@NC/C, Pt<sub>1</sub>Ru<sub>1</sub>@NC/C and Pt<sub>1</sub>Ru<sub>2</sub>@NC/C catalysts according the powder X-ray diffraction patterns.

| Catalysts                               | Wt%<br>form ICP | ECSA<br>(m <sup>2</sup> /g <sub>Pt</sub> ) | <i>I</i> / <i>I</i> <sub>b</sub> | Peak currents<br>from CV curves |         |
|-----------------------------------------|-----------------|--------------------------------------------|----------------------------------|---------------------------------|---------|
|                                         |                 |                                            |                                  | MA                              | SA      |
|                                         |                 |                                            |                                  | (mA/ug <sub>Pt</sub> )          | (mA/cm) |
| Pt <sub>1</sub> Ru <sub>0.5</sub> /C@NC | 7.3             | 49                                         | 6.86                             | 0.59                            | 1.29    |
| Pt <sub>1</sub> Ru <sub>1</sub> /C@NC   | 6.3             | 47                                         | 7.17                             | 0.67                            | 1.36    |
| Pt <sub>1</sub> Ru <sub>2</sub> /C@NC   | 4.6             | 39                                         | 5.46                             | 0.23                            | 0.59    |

**Table S3.** The details of the electroactivity in Pt<sub>1</sub>Ru<sub>0.5</sub>/C@NC, Pt<sub>1</sub>Ru<sub>1</sub>/C@NC and Pt<sub>1</sub>Ru<sub>2</sub>/C@NC catalysts.

| Catalysts                                          | <i>I</i> / <i>I</i> <sub>b</sub> | Onset                    | Peak currents from CV       |                             | Electrolytes                                                    | References |
|----------------------------------------------------|----------------------------------|--------------------------|-----------------------------|-----------------------------|-----------------------------------------------------------------|------------|
|                                                    |                                  | Potential(v) of          | curves                      |                             |                                                                 |            |
|                                                    |                                  | CO oxidation<br>(vs RHE) | MA<br>(A/mg <sub>Pt</sub> ) | SA<br>(mA/cm <sup>2</sup> ) |                                                                 |            |
| PtRu/PPDA MWCNTs                                   | ---                              | 0.15 (Vs SCE)            | ---                         | 0.732                       | 0.5 M H <sub>2</sub> SO <sub>4</sub> + 1 M CH <sub>3</sub> OH   | 1          |
| Porous Ru <sub>50</sub> Pt <sub>50</sub> /C        | ---                              | ---                      | ---                         | 1.32                        | 0.1 M HClO <sub>4</sub> + 0.5 M CH <sub>3</sub> OH              | 2          |
| Pt <sub>13</sub> Ru <sub>22</sub>                  | 0.97                             | ---                      | 0.86                        | 0.59                        | 0.5 M H <sub>2</sub> SO <sub>4</sub> + 0.5 M CH <sub>3</sub> OH | 3          |
| PtRu NWs                                           | ---                              | ---                      | 0.36                        | 1.16                        | 0.1 M HClO <sub>4</sub> + 0.5 M CH <sub>3</sub> OH              | 4          |
| Pt <sub>4</sub> Ru <sub>4</sub> Fe <sub>2</sub> /C | ---                              | 0.40                     | 0.11                        | 1.31                        | 1 M H <sub>2</sub> SO <sub>4</sub> + 1 M CH <sub>3</sub> OH     | 5          |
| Pt <sub>5</sub> Ru <sub>3</sub> Fe <sub>2</sub> /C | ---                              | 0.30                     | 0.107                       | 1.22                        | 1 M H <sub>2</sub> SO <sub>4</sub> + 1 M CH <sub>3</sub> OH     | 5          |
| Pt <sub>1</sub> Ru <sub>0.5</sub> /C@NC            | 6.86                             | 0.36                     | 0.59                        | 1.29                        | 0.1 M HClO <sub>4</sub> + 0.5 M CH <sub>3</sub> OH              | This Work  |
| Pt <sub>1</sub> Ru <sub>1</sub> /C@NC              | 7.17                             | 0.35                     | 0.67                        | 1.36                        | 0.1 M HClO <sub>4</sub> + 0.5 M CH <sub>3</sub> OH              | This Work  |

**Table S4.** A brief comparison of the MOR electrochemical activity of the catalysts reported in the currently literature to the homemade Pt<sub>1</sub>Ru<sub>0.5</sub>/C@NC, Pt<sub>1</sub>Ru<sub>1</sub>/C@NC catalyst.

## Reference:

- (1) Wu, B. H.; Zhu, J. J.; Li, X.; Wang, X. Q.; Chu, J.; Xiong, S. X. PtRu nanoparticles supported on p-phenylenediamine-functionalized multiwalled carbon nanotubes: enhanced activity and stability for methanol oxidation. *Ionics* **2019**, *25*, 181-189.
- (2) Zhao, W. Y.; Ni, B.; Yuan, Q.; He, P. L.; Gong, Y.; Gu, L.; Wang, X. Highly Active and Durable Pt<sub>72</sub>Ru<sub>28</sub> Porous Nanoalloy Assembled with Sub-4.0 nm Particles for Methanol Oxidation. *Adv. Energy Mater.* **2017**, 1601593.
- (3) Kaplan, D.; Burstein, L.; Popov, I.; Peled, E. The Effect of Different Pt:Ru Surface Composition on Methanol-Oxidation Activity of Carbon-Supported PtRu/IrNi Catalysts, *J. Electrochem. Soc.* **2016**, *163*, 1004-1010.
- (4) Huang, L.; Zhang, X. P.; Wang, Q. Q.; Han, Y. J.; Fang, Y. X.; Dong, S. J. Shape-Control of PtRu Nanocrystals: Tuning Surface Structure for Enhanced Electrocatalytic Methanol Oxidation. *J. Am. Chem. Soc.* **2018**, *140*, 1142–1147.
- (5) Lee, K. R.; Jeon, M. K.; Woo, S. I. Composition optimization of PtRuM/C (M = Fe and Mo) catalysts for methanol electro-oxidation via combinatorial method. *Appl. Catal. B: Environ.* **2009**, *91*, 428-433.
